# Supplementary material for: Integrative network-centric approach reveals signaling pathways associated with plant resistance and susceptibility to Pseudomonas syringae
Source: PLoS Biol. 2018 Dec 12;16(12):e2005956. doi: 10.1371/journal.pbio.2005956 (PMC6322785; doi:10.1371/journal.pbio.2005956)
Supplement: S4 Table — (XLSX) [file pbio.2005956.s013.xlsx]

## Sheet: Sheet1
Labels	AvrPto	HopA1	HopAF1	HopAI1	HopM1
Min	1.33441	5.32766	2.83329	5.77051	-0.403833
Q1	1.93442	7.02462	4.14947	6.66509	-0.28256
Median	2.61979	9.98214	5.29902	9.45833	-0.247321
Q3	3.87697	12.8979	7.17998	13.6324	-0.214771
Max	27.8972	37.9029	78.0437	213.319	0.0214364
IQR	1.94254	5.87329	3.03051	6.96729	0.0677893
Upper Outliers	5	4	7	7	3
Lower Outliers	0	0	0	0	1
For the Box (IQR and Median)
Q2-Q1	0.685372	2.95753	1.14955	2.79324	0.035239
Q3-Q2	1.25717	2.91577	1.88096	4.17405	0.0325503
For the Whiskers
Q3+1.5*IQR	6.79078	21.7079	11.7257	24.0833	-0.113087
Q1-1.5*IQR	-0.979395	-1.78532	-0.3963	-3.78585	-0.384244
Upper Whisker	6.79078	21.7079	11.7257	24.0833	-0.113087
Lower Whisker	1.33441	5.32766	2.83329	5.77051	-0.384244
Wupper-Q3	2.91382	8.80994	4.54577	10.4509	0.101684
Q1-Wlower	0.600008	1.69695	1.31618	0.894576	0.101684
For the Outliers
Max	27.8972	37.9029	78.0437	213.319	0.0214364
Min	#N/A	#N/A	#N/A	#N/A	-0.403833
Data Table	AvrPto	HopA1	HopAF1	HopAI1	HopM1
	27.8972	37.9029	78.0437	213.319	-0.252371
	10.2562	34.2472	21.4327	43.0563	-0.135554
	9.95775	31.0673	16.5476	34.7976	-0.158675
	9.76299	21.8717	16.3785	34.6868	-0.247111
	9.72028	18.3238	15.5633	30.3891	-0.211992
	6.74654	17.8135	13.673	28.1446	-0.24177
	5.90794	17.5059	12.2682	26.9868	-0.271967
	4.50051	17.4727	10.5818	21.0315	-0.225067
	4.03025	17.1887	9.84122	18.7509	-0.24032
	3.9277	16.9041	8.39231	15.9707	-0.276044
	3.87697	12.8979	7.17998	13.6324	-0.298724
	3.86803	12.7923	7.15849	13.1599	-0.284468
	3.57931	12.7012	7.02509	12.4427	-0.242433
	3.55789	11.9321	6.82491	11.9919	-0.242529
	3.52682	11.5508	6.20924	11.6816	-0.2708
	3.387	10.7596	6.1314	11.6663	-0.207247
	3.38445	10.5664	5.63773	11.6611	-0.249714
	3.19486	10.3849	5.50352	11.434	-0.247531
	2.90425	10.3031	5.4304	10.6328	-0.276837
	2.72308	9.99657	5.33427	9.83649	0.0214364
	2.61979	9.98214	5.29902	9.45833	-0.403833
	2.60824	9.43865	5.22943	9.18258	-0.223106
	2.46135	9.36373	5.19792	9.04071	0.0155594
	2.4466	9.3592	5.02615	9.03448	-0.337845
	2.38666	9.17539	4.79137	8.76441	-0.350084
	2.36109	9.03278	4.50488	8.28931	-0.35757
	2.2596	8.94257	4.4993	8.10055	-0.368626
	2.23288	8.7424	4.48394	7.66662	-0.165505
	2.05841	8.24613	4.47859	7.35936	-0.371194
	1.96607	7.23255	4.20815	7.24018	-0.00848665
	1.93442	7.02462	4.14947	6.66509
	1.87971	6.93514	4.12557	6.4481
	1.8511	6.57661	3.93641	6.30694
	1.77921	6.36342	3.84659	6.29755
	1.55807	6.36105	3.48661	6.21214
	1.489	6.08135	3.42675	6.19261
	1.47347	5.83445	3.29115	6.16574
	1.45728	5.55754	3.15081	5.94278
	1.41858	5.51382	2.86597	5.93101
	1.40035	5.4776	2.84428	5.83524
Insert new rows above this line	1.33441	5.32766	2.83329	5.77051
	1.19847	5.14493	2.80598	5.54709
		5.05038	2.66779	5.53216
		4.76945	2.61656	5.44932
		4.74085	2.59016	5.32943
		4.70791	2.46656	5.29943
		4.63317	2.45636	5.27224
		4.52185	2.43564	5.09739
		4.48519	2.43227	5.06748
		4.2559	2.3617	4.87758
		4.20273	2.27117	4.66224
		4.1021	2.2636	4.53549
		3.94993	2.05244	4.46791
		3.87225	2.04135	4.32207
		3.83354	1.92646	4.05248
		3.81528	1.91115	3.97818
		3.79925	1.89763	3.64578
		3.75672	1.78648	3.62869
		3.74451	1.74976	3.57995
		3.65794	1.70388	3.53458
		3.6388	1.66342	3.50778
		3.57764	1.65251	3.44371
		3.57158	1.61442	3.40747
		3.5442	1.5636	3.34382
		3.27257	1.5431	3.2995
		3.22644	1.42507	3.20804
		3.03211	1.40305	3.13595
		2.82816	1.35256	3.11306
		2.78192	1.24933	2.93391
		2.74596		2.93172
		2.7252		2.77538
		2.69453		2.67438
		2.65446		2.66998
		2.61598		2.65171
		2.51066		2.59405
		2.47801		2.31108
		2.44414		2.21821
		2.44089		2.09557
		2.43181		1.99686
		2.39888		1.99582
		2.35493		1.93536
		2.29605		1.93268
		2.23247		1.92059
		2.16698		1.89825
		2.16363		1.87192
		2.15281		1.83087
		2.14381		1.82343
		2.11262		1.8137
		2.07524		1.76225
		1.98554		1.7533
		1.94404		1.72145
		1.85129		1.70485
		1.81573		1.6492
		1.81295		1.61303
		1.75842		1.60902
		1.68856		1.50813
		1.67197		1.49509
		1.61695		1.49164
		1.6093		1.48273
		1.58385		1.45599
		1.51996		1.4515
		1.51906
		1.47684
		1.38938
		1.38188
		1.32112
		1.30058
		1.25736
		1.19285
