# Supplementary material for: Integrative network-centric approach reveals signaling pathways associated with plant resistance and susceptibility to Pseudomonas syringae
Source: PLoS Biol. 2018 Dec 12;16(12):e2005956. doi: 10.1371/journal.pbio.2005956 (PMC6322785; doi:10.1371/journal.pbio.2005956)
Supplement: S5 Table — (XLSX) [file pbio.2005956.s014.xlsx]

## Sheet: Sheet1
KEI#	PlantP Class ID		CLASS	Number of KEIs	Number of Kinases tested (TOKEN library)	Total	%targets
143	PPC:1.1.1		Class 1 (RLK/RLCKs)	55	75	130	42.3077
89	PPC:1.1.2		Class 2 (Raf-like)	13	9	22	59.0909
37	PPC:1.1.3		Class 3 (Casein PKs)	2	6	8	25
147	PPC:1.1.3		Class 4 (MAPKs)	55	62	117	47.0085
188	PPC:1.1.3		Class 5 (Other)	3	1	4	75
149	PPC:1.10.1
45	PPC:1.11.1
150	PPC:1.11.1				KEIs	Non-targets	TOKN	%
151	PPC:1.12.1		Group 1.12	LRR-RLKs	13	3	16	81.25	0.81
152	PPC:1.12.1		Group 1.13	LRR-RLKs	6	4	10	60	0.6
91	PPC:1.12.2		Group 1.2	RLCKs	8	20	28	28.5714	0.29
92	PPC:1.12.2		Group 1.7	S & Duf26 domain	5	8	13	38.4615	0.38
153	PPC:1.12.2		Group 2.1.4	GmPK6	8	5	13	61.5385	0.62
154	PPC:1.12.2		Group 4.2.6	IRE/S6K	8	5	13	61.5385	0.62
156	PPC:1.12.2		Group 4.2.4	SnRK	16	12	28	57.1429	0.57
279	PPC:1.12.2		Group 4.2.1	CDPKs	4	10	14	28.5714	0.28
342	PPC:1.12.2		Group 4.5.1	MAPKs	7	6	13	53.8462	0.54
158	PPC:1.12.3
35	PPC:1.12.4
345	PPC:1.12.4
72	PPC:1.12.5
348	PPC:1.13.2
160	PPC:1.13.3
161	PPC:1.13.3
163	PPC:1.13.3
164	PPC:1.13.3
11	PPC:1.13.4
350	PPC:1.15.1
104	PPC:1.16.1
9	PPC:1.2.1
7	PPC:1.2.2
86	PPC:1.2.2
105	PPC:1.2.2
192	PPC:1.2.2
285	PPC:1.2.2
286	PPC:1.2.2
355	PPC:1.2.2
194	PPC:1.3.3
289	PPC:1.5.1
357	PPC:1.5.1
290	PPC:1.5.2
196	PPC:1.5.3
293	PPC:1.6.1
201	PPC:1.6.3
295	PPC:1.6.3
38	PPC:1.7.2
44	PPC:1.7.2
113	PPC:1.7.2
206	PPC:1.7.2
361	PPC:1.7.2
26	PPC:1.9.1
209	PPC:1.9.1
298	PPC:1.9.1
365	PPC:1.9.2
220	PPC:1.Other
52	PPC:2.1.2
221	PPC:2.1.2
366	PPC:2.1.2
20	PPC:2.1.3
25	PPC:2.1.4
63	PPC:2.1.4
119	PPC:2.1.4
120	PPC:2.1.4
223	PPC:2.1.4
278	PPC:2.1.4
299	PPC:2.1.4
368	PPC:2.1.4
51	PPC:2.1.6
229	PPC:3.1.1
301	PPC:3.1.1
302	PPC:4.1.1
304	PPC:4.1.3
305	PPC:4.1.4
6	PPC:4.1.5.1
47	PPC:4.2.1
54	PPC:4.2.1
235	PPC:4.2.1
237	PPC:4.2.1
33	PPC:4.2.4
244	PPC:4.2.4
245	PPC:4.2.4
247	PPC:4.2.4
248	PPC:4.2.4
250	PPC:4.2.4
251	PPC:4.2.4
252	PPC:4.2.4
255	PPC:4.2.4
311	PPC:4.2.4
313	PPC:4.2.4
315	PPC:4.2.4
318	PPC:4.2.4
319	PPC:4.2.4
376	PPC:4.2.4
377	PPC:4.2.4
257	PPC:4.2.6
259	PPC:4.2.6
260	PPC:4.2.6
322	PPC:4.2.6
323	PPC:4.2.6
324	PPC:4.2.6
379	PPC:4.2.6
381	PPC:4.2.6
326	PPC:4.2.7
80	PPC:4.3.1
382	PPC:4.4.1
263	PPC:4.5.1
264	PPC:4.5.1
327	PPC:4.5.1
329	PPC:4.5.1
383	PPC:4.5.1
384	PPC:4.5.1
73	PPC:4.5.1.1
10	PPC:4.5.2
67	PPC:4.5.2
266	PPC:4.5.2
267	PPC:4.5.2
385	PPC:4.5.2
271	PPC:4.5.3
272	PPC:4.5.4
273	PPC:4.5.4
274	PPC:4.5.4
275	PPC:4.5.4
338	PPC:4.5.4
387	PPC:4.5.4
40	PPC:4.5.7
339	PPC:5.1.1
389	PPC:5.1.1
31	PPC:5.1.2
