# Supplementary material for: Integrative network-centric approach reveals signaling pathways associated with plant resistance and susceptibility to Pseudomonas syringae
Source: PLoS Biol. 2018 Dec 12;16(12):e2005956. doi: 10.1371/journal.pbio.2005956 (PMC6322785; doi:10.1371/journal.pbio.2005956)
Supplement: S12 Table — (XLSX) [file pbio.2005956.s021.xlsx]

## Sheet: Sheet1
	Averages					Standard error (SE)
	HopQ1	MKK7	MKK9			Q1 SE	MKK7 SE	MKK9 SE
KEI7	1.33333	3.55556	3.16667	7		0.166667	0.160174	0.105409
KEI20	1.4	3.17647	1.5	20		0.305505	0.260589	0.223607
KEI25	2.11111	2.91667	3.05556	25		0.423099	0.131762	0.293972
KEI33	2.35	3.41667	3.55556	33		0.310136	0.0721688	0.100154
KEI37	2.04545	3.35417	2.61111	37		0.232409	0.0995175	0.145004
KEI72	1.55556	3.33333	3.16667	72		0.175682	0.117851	0.166667
KEI86	3	3.77083	2.375	86		0.309173	0.167021	0.155395
KEI91	2.125	2.86667	1.5	91		0.47949	0.336178	0.241523
KEI92	3.44444	2.95833	3.3125	92		0.337931	0.170875	0.127345
KEI104	3	3.35417	2.4375	104		0.267261	0.209749	0.157288
KEI143	3	2.19444	3.13889	143		0.288675	0.194444	0.145004
KEI149	2.58824	3.22222	3.41667	149		0.271959	0.334489	0.171796
KEI150	2.33333	3.19444	2.94444	150		0.235702	0.185301	0.130289
KEI151	2.77778	3.36111	2.52778	151		0.277778	0.0734931	0.158358
KEI153	2.52941	2.75	2.5	153		0.285915	0.11024	0.150231
KEI156	2.88889	3.16667	2.86111	156		0.260579	0.270031	0.118667
KEI160	2	3.36111	3.27778	160		0.235702	0.0844828	0.0972222
KEI161	2.11765	3.5	3.08333	161		0.240746	0.138193	0.228218
KEI163	2.55556	2.94444	2.22222	163		0.376796	0.316715	0.146986
KEI188	2.76471	2.41667	1.45833	188		0.278248	0.22455	0.170029
KEI196	2.57143	2.5	2.80556	196		0.309453	0.0931695	0.13679
KEI221	2.61538	2.53846	1.41667	221		0.400936	0.332346	0.228908
KEI250	1.68	2.38462	1.65385	250		0.243036	0.242277	0.207122
KEI255	2.41667	2.08333	1.33333	255		0.39807	0.39807	0.188025
KEI259	2.875	2.66667	1.33333	259		0.398098	0.414388	0.188025
KEI272	1.77778	2.2381	1.52381	272		0.274821	0.247894	0.214021
KEI279	3.27273	3.39583	3.5	279		0.194978	0.128579	0.0833333
KEI304	2.1	3.66667	2.80556	304		0.378594	0.0721688	0.142995
KEI311	2.7	3.36111	2.16667	311		0.260342	0.138889	0.125
KEI318	2.83333	2.97222	2.75	318		0.385992	0.210177	0.190941
KEI323	2.25	2.86111	3.16667	323		0.526104	0.200308	0.131762
KEI327	1.875	3.55556	2.19444	327		0.314576	0.130289	0.123447
KEI339	2	3.55556	3.22222	339		0.302765	0.0910755	0.113685
KEI342	2.90909	3.83333	3.94444	342		0.368154	0.0931695	0.0555556
KEI376	3.22222	3.05556	2.47222	376		0.364302	0.130289	0.087841
FLS2	2.10345	3.14815	2.87963	FLS2		0.200644	0.142637	0.133687
EC1	2.91176	3.03704	3.13889	EC1		0.204092	0.184939	0.132995
